# Supplementary material for: Facile fabrication and photoelectrochemical properties of a one axis-oriented NiO thin film with a (111) dominant facet
Source: Royal Society of Chemistry journal article supplement (doi:10.1039/c4ta03606a), 2014-01-01
Supplement: c4ta03606a1.pdf [file c4ta03606a1.pdf]

## Supporting Information

### Facile Fabrication and Photoelectrochemical Properties of One Axis-Oriented NiO Thin Film with (111) Dominant Facet

*Chang Woo Kim,<sup>a</sup> Young Seok Son,<sup>a</sup> Amol Uttam Pawar,<sup>a</sup> Myoung Jong Kang,<sup>a</sup> Jin You Zheng,<sup>a</sup> Vivek*

*Sharma,<sup>b</sup> Paritosh Mohanty<sup>b,\*</sup> and Young Soo Kang<sup>a,\*</sup>*

<sup>a</sup> Korea Center for Artificial Photosynthesis and Department of Chemistry, Sogang University, Seoul 121-742, Republic of Korea

<sup>b</sup> Department of Applied Science and Engineering, IIT Roorkee, Saharanpur Campus, Saharanpur 247001, U.P., India

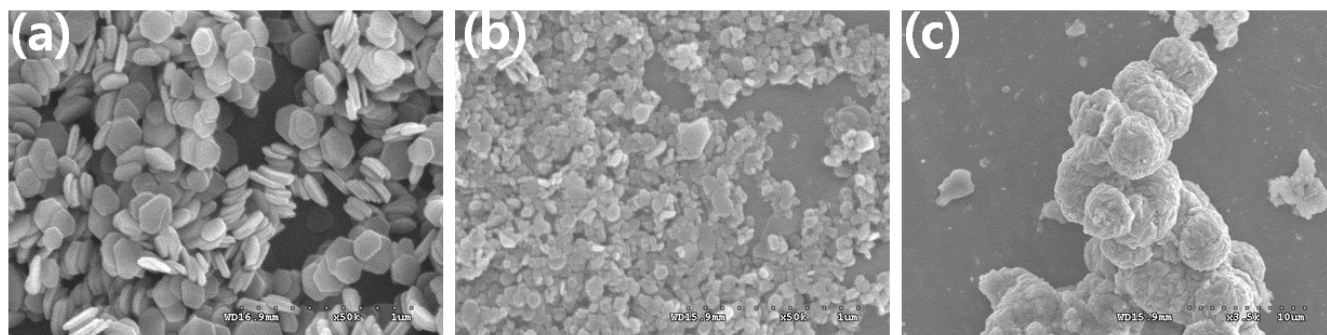

**Figure S1.** The comparison of SEM images of Ni(OH)<sub>2</sub> particles. (a) Hexagonal plate by synthesizing 5 mL of 2.0 M Ni salt and 15 mL of 0.5 M NaOH, (b) Particle by synthesizing 10 mL of 2.0 M Ni salt and 10 mL of 0.5 M NaOH, and (c) Microstructure by synthesizing 10 mL of 2.0 M Ni salt and 5 mL of 0.5 M NaOH

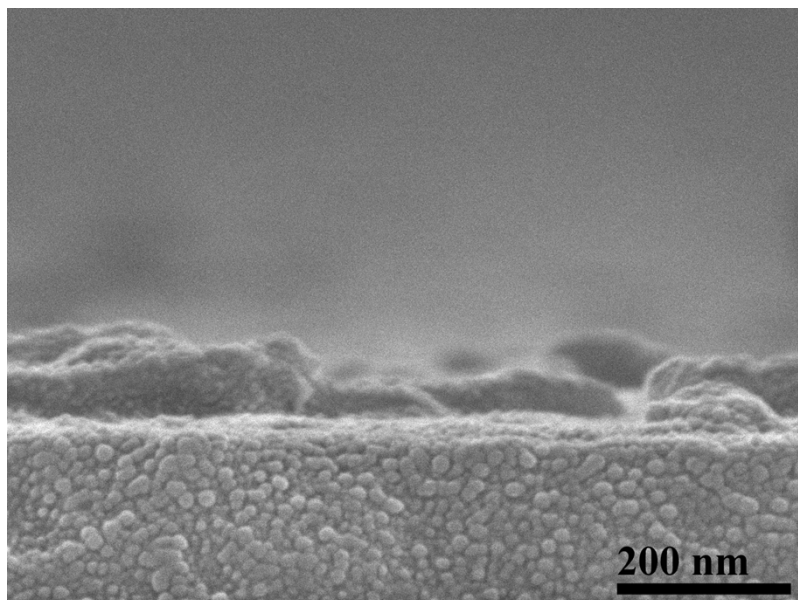

**Figure S2.** Typical cross-sectional SEM image of (111) axis-oriented NiO thin film.

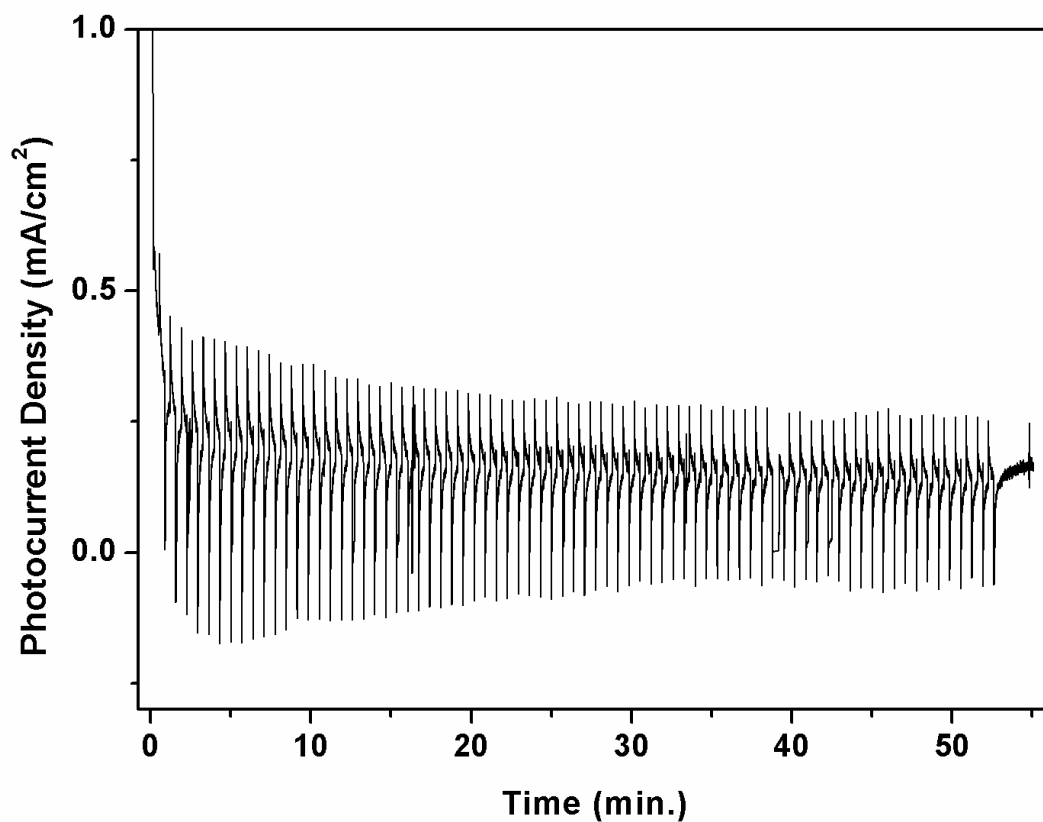

**Figure S3.** The photoresponse curve of (111) facet-oriented NiO thin film by keeping the light (1 sun illumination) on or off every 20 s for 1 h, at -0.9 V (vs Ag/AgCl) in 1.0 M KOH at room temperature.
